# Supplementary material
Source: PubMed Central journal article supplement (PMC3122684)
Supplement: supp_49_5_1750__1.pdf [file supp_49_5_1750__1.pdf]

| <b>Locus Tag</b> | <b>Identity<sup>c</sup></b>                     | <b>Closest relationship<sup>a</sup></b> | <b>Identity<sup>c</sup></b> | <b>Identity with BH-01-0142 (HS3/13/50)</b> |
|------------------|-------------------------------------------------|-----------------------------------------|-----------------------------|---------------------------------------------|
| HS3.01           | MeOPN biosynthesis                              | Cj1415c (cysC)                          | 168/170 (98%)               | 170/170 (100%)                              |
| HS3.02           | MeOPN biosynthesis                              | CJJ81176_1414                           | 253/253 (100%)              | 253/253 (100%)                              |
| HS3.03           | MeOPN biosynthesis                              | CJJ81176_1416                           | 199/200 (99%)               | 200/200 (100%)                              |
| HS3.04           | MeOPN biosynthesis                              | CJJ81176_1417                           | 776/779 (99%)               | 766/766 (100%)                              |
| HS3.05           | Unknown                                         | CJJ81176_1418                           | 258/259 (99%)               | 262/262 (100%)                              |
| HS3.06*          | Unknown                                         | CJJ81176_1419                           | 254/257 (98%)               | 267/267 (100%)                              |
| HS3.07*          | putative MeOPN transferase                      | Cj8421_1470                             | 323/632 (51%)               | 574/577 (99%)                               |
| HS3.08           | putative sugar-phosphate nucleotidyltransferase | hddC                                    | 212/224 (94%)               | 224/224 (100%)                              |
| HS3.09           | sedoheptulose 7-phosphate isomerase             | gmhA2                                   | 162/166 (97%)               | 194/194 (100%)                              |
| HS3.10*          | putative sugar transferase                      | HS41.09                                 | 182/358 (50%)               | 335/335 (100%)                              |
| HS3.11           | D-glycero-Dmanno-heptose 1-phosphate kinase     | hddA                                    | 339/339 (100%)              | 339/339 (100%)                              |
| HS3.12           | putative sugar-nucleotide epimerase/dehydratase | Cj8421_1474                             | 311/312 (99%)               | 311/312 (99%)                               |
| HS3.13*          | GDP-mannose 4,6-dehydratase                     | dmhA                                    | 357/358 (99%)               | 358/358 (100%)                              |
| HS3.14           | GDP-fucose synthetase                           | fcl                                     | 338/346 (97%)               | 346/346 (100%)                              |
| HS3.15           | putative nucleotide-sugar epimerase/dehydratase | Cj8486_1471c                            | 176/181 (97%)               | 181/181 (100%)                              |
| HS3.16           | putative sugar transferase                      | hddD                                    | 253/593 (42%)               | 598/598 (100%)                              |
| HS3.17*          | putative sugar transferase                      | HS41.06                                 | 205/597 (35%)               | 517/517(100%)                               |
| HS3.18           | putative sugar transferase                      | JJD26997_1424                           | 94/96 (97%)                 | 97/97 (100%)                                |
| HS3.19           | NAD dependent epimerase/dehydratase family      | JJD26997_1425                           | 194/199 (97%)               | 207/207 (100%)                              |
| HS3.20           | putative sugar transferase                      | JJD26997_1426                           | 431/449 (95%)               | 450/450 (100%)                              |
| HS3.21           | putative sugar transferase                      | CJJ26094_1492                           | 168/471 (35%)               | 453/453 (100%)                              |
| HS3.22           | putative sugar transferase                      | ggaB                                    | 728/796 (91%)               | 804/804 (100%)                              |
| HS3.23           | putative glycosyl transferase                   | Cj8486_1479c                            | 512/542 (94%)               | 542/542 (100%)                              |

| <b>Locus Tag</b> | <b>Putative function<sup>a</sup></b>             | <b>Closest relationship<sup>a</sup></b> | <b>Identity<sup>c</sup></b> |
|------------------|--------------------------------------------------|-----------------------------------------|-----------------------------|
| HS4.01           | MeOPN biosynthesis                               | Cj8486_1458c                            | 168/170 (98%)               |
| HS4.02           | MeOPN biosynthesis                               | Cj8486_1459c                            | 253/253 (100%)              |
| HS4.03           | MeOPN biosynthesis                               | Cj8486_1460c                            | 197/200 (98%)               |
| HS4.04           | MeOPN biosynthesis                               | Cj8486_1461c                            | 776/779 (99%)               |
| HS4.05           | Unknown                                          | Cj8486_1462c                            | 249/253 (98%)               |
| HS4.06*          | Unknown                                          | Cj8486_1463c                            | 256/257 (99%)               |
| HS4.07*          | putative MeOPN transferase                       | Cj8486_1464c                            | 91/359 (25%)                |
| HS4.08           | putative sugar-phosphate nucleotidyltransferase  | hddC                                    | 217/224 (97%)               |
| HS4.09           | sedoheptulose 7-phosphate isomerase              | gmhA2                                   | 193/201 (96%)               |
| HS4.10           | D-glycero-Dmanno-heptose 1-phosphate kinase      | hddA                                    | 333/339 (98%)               |
| HS4.11           | putative sugar-nucleotide epimerase/dehydratease | Cj8486_1468c                            | 312/312 (100%)              |
| HS4.12*          | GDP-mannose 4,6-dehydratase                      | dmhA                                    | 343/344 (99%)               |
| HS4.13           | GDP-fucose synthetase                            | fcl                                     | 337/347 (98%)               |

|         |                                                 |                           |                |
|---------|-------------------------------------------------|---------------------------|----------------|
| HS4.14  | putative nucleotide-sugar epimerase/dehydratase | Cj8486_1471c              | 176/181 (97%)  |
| HS4.15  | putative sugar transferase                      | Cj8486_1472c <sup>d</sup> | 1227/1241(99%) |
| HS4.16* | putative MeOPN transferase                      | Cj8486_1475               | 332/628 (53%)  |
| HS4.17  | putative sugar transferase                      | ggaB                      | 773/838 (92%)  |
| HS4.18  | putative glycosyltransferase                    | Cj8486_1479c              | 514/542 (95%)  |

| <b>Locus Tag</b> | <b>Putative function<sup>a</sup></b>              | <b>Closest relationship<sup>b</sup></b> | <b>Identity<sup>c</sup></b> |
|------------------|---------------------------------------------------|-----------------------------------------|-----------------------------|
| HS10.01          | MeOPN biosynthesis                                | Cj8486_1458c                            | 168/170 (98%)               |
| HS10.02          | MeOPN biosynthesis                                | Cj8486_1459c                            | 253/253 (100%)              |
| HS10.03          | MeOPN biosynthesis                                | Cj8486_1460c                            | 199/200 (99%)               |
| HS10.04          | MeOPN biosynthesis                                | Cj8486_1461c                            | 748/752 (99%)               |
| HS10.05          | Unknown                                           | Cj8486_1462c                            | 252/253 (99%)               |
| HS10.06*         | Unknown                                           | Cj8486_1463c                            | 254/257 (98%)               |
| HS10.07*         | MeOPN transferase                                 | HS41.05                                 | 232/633 (37%)               |
| HS10.08          | heptosyltransferase                               | Cj1431c (hddD)                          | 180/589 (30%)               |
| HS10.09          | putative sugar-phosphate nucleotidyltransferase   | hddC                                    | 181/198 (91%)               |
| HS10.10          | sedoheptulose 7-phosphate isomerase               | gmhA2                                   | 193/201 (96%)               |
| HS10.11          | D-glycero-D-manno-heptose 7-phosphate kinase      | hddA                                    | 330/339 (97%)               |
| HS10.12          | GDP-mannose 4,6-dehydratase                       | dmhA                                    | 327/343 (95%)               |
| HS10.13          | GDP-fucose synthetase                             | fcl                                     | 342/353 (96%)               |
| HS10.14*         | GDP-fucose synthetase                             | CJJ26094_1481 (fcl2)                    | 352/357 (98%)               |
| HS10.15          | putative nucleotide-sugar epimerase-dehydratase   | CJJ26094_1482                           | 175/181 (96%)               |
| HS10.16          | putative nucleotidyl-sugar pyranose mutase        | CJJ26094_1483 (glF)                     | 354/406 (88%)               |
| HS10.17          | putative sugar transferase                        | CJJ81176_1433                           | 171/487 (36%)               |
| HS10.18          | putative sugar transferase                        | CJJ26094_1490                           | 33/102 (32%)                |
| HS10.19          | putative sugar transferase                        | CJJ26094_1492                           | 93/287 (32%)                |
| HS10.20          | UDP-galactopyranose mutase                        | CJJ26094_1485 (glF3)                    | 200/375 (53%)               |
| HS10.21          | putative molybdenum cofactor biosynthesis protein | CJJHB9313_1449                          | 205/341 (60%)               |
| HS10.22          | glucose-1-phosphate cytidyltransferase            | CJJ26094_1489                           | 167/239 (69%)               |
| HS10.23          | putative sugar transferase                        | ggaB                                    | 719/813 (89%)               |
| HS10.24          | putative sugar transferase                        | Cj8486_1479c                            | 117/121 (96%)               |
| HS10.25          | putative sugar transferase                        | Cj8486_1479c                            | 404/419 (96%)               |

| <b>Locus Tag</b> | <b>Putative function<sup>a</sup></b> | <b>Closest relationship<sup>b</sup></b> | <b>Identity<sup>c</sup></b> |
|------------------|--------------------------------------|-----------------------------------------|-----------------------------|
| HS15.01          | MeOPN biosynthesis                   | Cj8486_1458c                            | 168/170 (98%)               |
| HS15.02          | MeOPN biosynthesis                   | Cj8486_1459c                            | 253/253 (100%)              |
| HS15.03          | MeOPN biosynthesis                   | Cj8486_1460c                            | 199/200 (99%)               |
| HS15.04          | MeOPN biosynthesis                   | Cj8486_1461c (ppsA)                     | 768/779 (98%)               |

|          |                                                 |                       |                |
|----------|-------------------------------------------------|-----------------------|----------------|
| HS15.05  | Unknown                                         | Cj8486_1462c          | 251/253 (99%)  |
| HS15.06* | Unknown                                         | Cj8486_1463c          | 254/257 (99%)  |
| HS15.07* | MeOPN transferase                               | Cj8486_1464c          | 496/523 (94%)  |
| HS15.08  | putative sugar-phosphate nucleotidyltransferase | hddC                  | 209/224 (93%)  |
| HS15.09  | sedoheptulose 7-phosphate isomerase             | gmhA2                 | 193/193 (100%) |
| HS15.10  | D-glycero-Dmanno-heptose 1-phosphate kinase     | hddA                  | 330/339 (98%)  |
| HS15.11  | GDP-mannose 4,6-dehydratase                     | dmhA                  | 328/343 (95%)  |
| HS15.12  | GDP-fucose synthetase                           | fcl                   | 198/353 (56%)  |
| HS15.13  | putative nucleotide-sugar epimerase/dehydratase | Cj8486_1471c          | 80/99 (81%)    |
| HS15.14  | putative sugar transferase                      | CJJ26094_1484         | 168/549 (30%)  |
| HS15.15  | putative glycosyl transferase                   | CJM1_1382             | 132/282 (47%)  |
| HS15.16  | UDP-galactopyranose mutase                      | CJJ26094_1493 (glF3)  | 356/370 (97%)  |
| HS15.17  | UDP-glucose 4-epimerase                         | CJJ26094_1494 (galE1) | 319/324 (98%)  |
| HS15.18  | UDP-glucose 6-dehydrogenase                     | CJJ26094_1495 (udg)   | 408/432 (94%)  |
| HS15.19  | NAD dependent epimerase/dehydratase family      | CJJ26094_1496 (galE2) | 307/318 (96%)  |
| HS15.20  | glycosyl transferase                            | CJJ26094_1497         | 444/460 (96%)  |
| HS15.21  | putative glycosyltransferase                    | CJJ26094_1498         | 327/347 (94%)  |
| HS15.22  | putative glycosyltransferase                    | CJJ26094_1499         | 513/543 (94%)  |

| Locus Tag | Putative function <sup>a</sup>                      | Closest relationship <sup>b</sup> | Identity <sup>c</sup> | Identity with ATCC 43436 (HS8) |
|-----------|-----------------------------------------------------|-----------------------------------|-----------------------|--------------------------------|
| HS17.01   | putative Na <sup>+</sup> /H <sup>+</sup> antiporter | HS41.01                           | 410/417 (99%)         | 417/417 (100%)                 |
| HS17.02   | Pyruvate kinase                                     | HS41.02                           | 317/319 (99%)         | 319/319 (100%)                 |
| HS17.03   | putative sulfate adenylyltransferase                | HS41.03                           | 343/348 (99%)         | 348/348 (100%)                 |
| HS17.04   | putative adenylylsulfate kinase                     | HS41.04                           | 173/177 (98%)         | 177/177 (100%)                 |
| HS17.05*  | putative sugar transferase                          | HS41.05                           | 324/605 (54%)         | 603/604 (99%)                  |
| HS17.06   | putative sugar-phosphate nucleotidyltransferase     | hddC                              | 224/224 (100%)        | 186/200 (93%)                  |
| HS17.07   | putative phosphoheptose isomerase                   | gmhA2                             | 171/178 (97%)         | 169/177 (95%)                  |
| HS17.08   | putative sugar kinase                               | hddA                              | 335/339 (99%)         | 335/339 (99%)                  |
| HS17.09   | GDP-mannose 4,6-dehydratase                         | dmhA                              | 331/343 (97%)         | 351/357 (98%)                  |
| HS17.10   | putative fucose synthetase                          | fcl                               | 337/346 (98%)         | 357/357 (100%)                 |
| HS17.11*  | putative fucose synthetase                          | fcl2                              | 343/348 (99%)         | 395/396 (99%)                  |
| HS17.12*  | hypothetical protein                                | Cj1429c                           | 304/308 (99%)         | 309/310 (99%)                  |
| HS17.13   | putative dTDP-4-dehydrorhamnose 3,5-epimerase       | Cj1430c (rbfC)                    | 173/176 (99%)         | 181/181 (100%)                 |
| HS17.14   | hypothetical protein                                | CJE1603                           | 209/671 (32%)         | 620/622 (99%)                  |
| HS17.15   | putative sugar transferase                          | CJJ26094_1474                     | 131/417 (32%)         | 422/424 (99%)                  |
| HS17.16   | putative CDP glycerol glycerophosphotransferase     | HS1.09 (tagF)                     | 464/1096 (43%)        | 1570/1577 (99%)                |
| HS17.17   | hypothetical protein                                | HS1.10                            | 366/381 (97%)         | 381/385 (99%)                  |
| HS17.18   | putative Glycerol-3-phosphate                       | HS1.11 (tagD)                     | 127/129 (99%)         | 128/129 (99%)                  |

| Locus Tag | Putative function <sup>a</sup>                      | Closest relationship <sup>b</sup> | Identity <sup>c</sup> |
|-----------|-----------------------------------------------------|-----------------------------------|-----------------------|
| HS42.01   | putative Na <sup>+</sup> /H <sup>+</sup> antiporter | HS41.01                           | 410/417 (98%)         |
| HS42.02   | Pyruvate kinase                                     | HS41.02                           | 316/319 (99%)         |
| HS42.03   | putative sulfate adenylyltransferase                | HS41.03                           | 343/348 (98%)         |
| HS42.04   | putative adenylylsulfate kinase                     | HS41.04                           | 173/177 (97%)         |
| HS42.05*  | putative sugar transferase                          | HS41.05                           | 323/605 (54%)         |
| HS42.06   | putative sugar-phosphate nucleotidyltransferase     | hddC                              | 203/224 (90%)         |
| HS42.07   | sedoheptulose 7-phosphate isomerase                 | gmhA2                             | 197/201 (98%)         |
| HS42.08   | D-glycero-Dmanno-heptose 1-phosphate kinase         | hddA                              | 333/339 (98%)         |
| HS42.09   | GDP-mannose 4,6-dehydratase                         | dmhA                              | 332/343 (96%)         |
| HS42.10   | GDP-fucose synthetase                               | fcl                               | 343/353 (97%)         |
| HS42.11   | putative nucleotide-sugar epimerase/dehydratase     | Cj1430c                           | 160/176 (90%)         |
| HS42.12   | putative sugar transferase                          | HS41.16                           | 170/525 (32%)         |
| HS42.13   | putative sugar transferase                          | HS41.22                           | 126/345 (36%)         |
| HS42.14   | putative sugar transferase                          | C8J_1342                          | 71/248 (28%)          |
| HS42.15   | nucleotidyl-sugar pyranose mutase                   | HS41.24 (glf3)                    | 355/364 (97%)         |
| HS42.16   | UDP-glucose 4-epimerase                             | HS41.25 (galE1)                   | 312/324 (96%)         |
| HS42.17   | putative UDP-glucose 6-dehydrogenase                | HS41.26 (udg)                     | 411/432 (95%)         |
| HS42.18   | nucleotidyl-sugar pyranose mutase                   | HS41.27 (galE2)                   | 308/318 (96%)         |
| HS42.19   | putative sugar transferase                          | HS41.28                           | 432/460 (93%)         |
| HS42.20   | putative sugar transferase                          | HS41.29                           | 325/349 (93%)         |
| HS42.21   | putative sugar transferase                          | HS41.30                           | 506/543 (93%)         |

Sup. Table 1: Capsule biosynthesis genes of HS3, HS4, HS10, HS15, HS17 and HS42. (a) Function attribution of genes and (b) closest relationship are the best BLASTP match on the non-redundant protein sequences database.

(c) In parenthesis is the percentage of identity between the protein and its best match in the protein database.

(d) Compared to the published sequence of HS4/13/64, the HS4 type strain appeared to have a fusion of the homolog of Cj8486\_1472c and Cj8486\_1474c. Sequence analysis confirmed the fusion of those genes in CG8486 as well. The sequence has been updated in the NCBI database as Cj8486\_1472c.

(\*) Homopolymeric GC tract.
