# Supplementary material
Source: PubMed Central journal article supplement (PMC3122684)
Supplement: supp_49_5_1750__2.pdf [file supp_49_5_1750__2.pdf]

| Strain     | Penner type | Primers |        |        |        |         |          |         |         |         |         |           |         |         |
|------------|-------------|---------|--------|--------|--------|---------|----------|---------|---------|---------|---------|-----------|---------|---------|
|            |             | Mu HS2  | Mu HS3 | Mu HS4 | Mu HS6 | Mu HS10 | Mu HS15C | Mu HS41 | Mu HS53 | Mu HS1D | Mu HS23 | Mu HS42 E | Mu HS44 | Mu 8486 |
| ATCC 43429 | HS1         | -       | -      | -      | -      | -       | -        | -       | -       | -       | +       | -         | -       | -       |
| BH-01-2    | HS1/44      | -       | -      | -      | -      | -       | -        | -       | -       | -       | +       | -         | -       | -       |
| NCTC 11168 | HS2         | +       | -      | -      | -      | -       | -        | -       | -       | -       | -       | -         | -       | -       |
| ATCC 43431 | HS3         | -       | +      | -      | -      | -       | -        | -       | -       | -       | -       | -         | -       | -       |
| ATCC 43432 | HS4         | -       | -      | +      | -      | -       | -        | -       | -       | -       | -       | -         | -       | -       |
| CG8486     | HS4/13/64   | -       | -      | -      | -      | -       | -        | -       | -       | -       | -       | -         | -       | +       |
| ATCC 43433 | HS5         | -       | -      | -      | -      | -       | -        | -       | -       | -       | -       | -         | -       | -       |
| 81116      | HS6         | -       | -      | -      | +      | -       | -        | -       | -       | -       | -       | -         | -       | -       |
| ATCC 43436 | HS8         | -       | -      | -      | -      | -       | -        | -       | -       | -       | -       | -         | -       | -       |
| ATCC 43438 | HS10        | -       | -      | -      | -      | +       | -        | -       | -       | -       | -       | -         | -       | -       |
| ATCC 43441 | HS13        | -       | -      | +      | -      | -       | -        | -       | -       | -       | -       | -         | -       | -       |
| ATCC 43442 | HS15        | -       | -      | -      | -      | -       | +        | -       | -       | -       | -       | -         | -       | -       |
| ATCC 43444 | HS17        | -       | -      | -      | -      | -       | -        | -       | -       | -       | -       | -         | -       | -       |
| ATCC 43446 | HS19        | -       | -      | -      | -      | -       | -        | -       | -       | -       | -       | -         | -       | -       |
| ATCC 43448 | HS22        | -       | -      | -      | -      | -       | -        | -       | -       | -       | -       | -         | -       | -       |
| 81-176     | HS23/36     | -       | -      | -      | -      | -       | -        | -       | -       | -       | +       | -         | -       | -       |
| ATCC 43478 | HS28        | -       | -      | -      | -      | -       | -        | -       | -       | -       | -       | -         | -       | -       |
| ATCC 43460 | HS41        | -       | -      | -      | -      | -       | -        | +       | -       | -       | -       | -         | -       | -       |
| ATCC 43461 | HS42        | -       | -      | -      | -      | -       | -        | -       | -       | -       | -       | +         | -       | -       |
| ATCC 43463 | HS44        | -       | -      | -      | -      | -       | -        | -       | -       | -       | -       | -         | +       | -       |
| ATCC 43465 | HS50        | -       | -      | -      | -      | -       | -        | -       | -       | -       | -       | -         | -       | -       |
| RM1221     | HS53        | -       | -      | -      | -      | -       | -        | -       | +       | -       | -       | -         | -       | -       |
| ATCC 49302 | HS64        | -       | -      | -      | -      | -       | -        | -       | -       | -       | -       | -         | -       | +       |

Sup. table 2: summary of PCR amplification of Multiplex primers pairs developed in this study.
